# Supplementary material for: Identification of Novel Loci Precisely Modulating Pre-Harvest Sprouting Resistance and Red Color Components of the Seed Coat in T. aestivum L
Source: MDPI journal article supplement (doi:10.3390/plants13101309), 2024-05-09
Supplement: s1 [file s1]

## Supplementary file 1

for Afonnikova et al. paper “Identification of novel loci precisely modulating pre-harvest sprouting resistance and red color components of the seed coat in *T. aestivum* L.”.

### Supplementary Tables

**Table S1.** Color parameters and characteristics they define (see Afonnikov et al., 2021) for detailed description of the seed color traits.

| Color space         | Color parameter                                    | Description                                                                                                                 |
|---------------------|----------------------------------------------------|-----------------------------------------------------------------------------------------------------------------------------|
| RGB <sup>1</sup>    | RGB_mR <sup>5</sup>                                | Mean value of the Red component intensity for seed pixels                                                                   |
|                     | RGB_mG <sup>5</sup>                                | Mean value of the Green component intensity for seed pixels                                                                 |
|                     | RGB_mB <sup>5</sup>                                | Mean value of the Blue component intensity for seed pixels                                                                  |
|                     | RGB_dCR_1,<br>RGB_dCG_1,<br>RGB_dCB_1 <sup>6</sup> | R,G,B component values for the first dominant color cluster                                                                 |
|                     | RGB_dCR_2,<br>RGB_dCG_2,<br>RGB_dCB_2 <sup>6</sup> | R,G,B component values for the second dominant color cluster                                                                |
|                     | RGB_dCR_3,<br>RGB_dCG_3,<br>RGB_dCB_3 <sup>6</sup> | R,G,B component values for the third dominant color cluster                                                                 |
| HSV <sup>2</sup>    | HSV_mH <sup>5</sup>                                | Mean value of the Hue component intensity for seed pixels                                                                   |
|                     | HSV_mS <sup>5</sup>                                | Mean value of the Saturation component intensity for seed pixels                                                            |
|                     | HSV_mV <sup>5</sup>                                | Mean value of the Value/Brightness component intensity for seed pixels, HSV color space.                                    |
|                     | HSV_dCH_1,<br>HSV_dCS_1,<br>HSV_dCV_1 <sup>6</sup> | H,S,V component values for the first dominant color cluster                                                                 |
|                     | HSV_dCH_2,<br>HSV_dCS_2,<br>HSV_dCV_2 <sup>6</sup> | H,S,V component values for the second dominant color cluster                                                                |
|                     | HSV_dCH_3,<br>HSV_dCS_3,<br>HSV_dCV_3 <sup>6</sup> | H,S,V component values for the third dominant color cluster                                                                 |
| L*a*b* <sup>3</sup> | Lab_ma <sup>5</sup>                                | Mean value of the a* component intensity for seed pixels. These values are positive for red and negative for green color.   |
|                     | Lab_mb <sup>5</sup>                                | Mean value of the b* component intensity for seed pixels. These values are positive for yellow and negative for blue color. |
|                     | Lab_mL <sup>5</sup>                                | Mean value of the Luminance component intensity for seed pixels.                                                            |
|                     | Lab_dCL_1,<br>Lab_dCa_1,<br>Lab_dCb_1 <sup>6</sup> | L*,a*,b* component values for the first dominant color cluster                                                              |

|                    |                                                            |                                                                                                                |
|--------------------|------------------------------------------------------------|----------------------------------------------------------------------------------------------------------------|
|                    | Lab_dCL_2,<br>Lab_dCa_2,<br>Lab_dCb_2 <sup>6</sup>         | L*,a*,b* component values for the second dominant color cluster                                                |
|                    | Lab_dCL_3,<br>Lab_dCa_3,<br>Lab_dCb_3 <sup>6</sup>         | L*,a*,b* component values for the third dominant color cluster                                                 |
| YCrCb <sup>4</sup> | YCrCb_mCr <sup>5</sup>                                     | Mean value of the Cr component intensity for seed pixels. These values are positive and larger for red color.  |
|                    | YCrCb_mCb <sup>5</sup>                                     | Mean value of the Cb component intensity for seed pixels. These values are positive and larger for blue color. |
|                    | YCrCb_mY <sup>5</sup>                                      | Mean value of the Luminance component intensity for seed pixels.                                               |
|                    | YCrCb_dCY_1,<br>YCrCb_dCCr_1,<br>YCrCb_dCCb_1 <sup>6</sup> | Y,Cr,Cb component values for the first dominant color cluster                                                  |
|                    | YCrCb_dCY_2,<br>YCrCb_dCCr_2,<br>YCrCb_dCCb_2 <sup>6</sup> | Y,Cr,Cb component values for the second dominant color cluster                                                 |
|                    | YCrCb_dCY_3,<br>YCrCb_dCCr_3,<br>YCrCb_dCCb_3 <sup>6</sup> | Y,Cr,Cb component values for the third dominant color cluster                                                  |

<sup>1</sup> RGB color space represents color in the intensities of the red (R), green (G) and blue (B) components

<sup>2</sup> The HSV space represent color as combination of the hue (H, the similarity to red, yellow, green, and blue colors depending on the value), saturation (S, the higher saturation, the more pure is the color), and value/intensity (V, the higher the value, the brighter the color) components.

<sup>3</sup> CIE L\*a\*b\* space expresses color as combination of the lightness (L\*, the greater value, the lighter is the color) and color components a\* (smaller values correspond to green, larger to red tones of the color) and b\* (smaller values correspond to blue, larger values correspond to yellow tones).

<sup>4</sup> YCrCb space represent color as a combination of luminance or luma (Y, the greater value, the higher luminance), difference between the red component and luma (Cr, the greater value, the close color to red) and difference between the blue component and luma (Cb, the greater value, the close color to blue).

<sup>5</sup> Mean color components. To calculate them, the mean and standard deviations of intensities for each of the color component channels were estimated first, then the pixels, whose intensities differ from the mean by more than three standard deviations were excluded from the analysis. The mean value was calculated for the remaining pixels and used further.

<sup>6</sup> Dominant color clusters components. To determine dominant colors, all seed pixels were grouped by color similarity into three clusters. The clusters were ranked by the number of pixels they contained. In each of the three clusters, the values of the three color components for the centroid were determined. This procedure was performed for each color space and resulted, respectively, in nine color descriptors. For example, for RGB space, these are RGB\_dCj\_i parameters, where j is the color component designation, i=1,2,3 is the number of the dominant cluster. For example, RGB\_dCR\_1 parameter is the R component for the first dominant color in RGB space. The use of three dominant colors allows for a more accurate estimation of the uneven seed coloring.

All the color components values vary from 0 to 255, except components related to the H of the HSV space, whose values range was from 0 to 180.

**Table S2.** Heritability and best GWAS model of PHS and grain color traits. FN - Falling number; GI\_milk - Germination index at the late milk/hard dough stage (GS77-GS87); GI\_mat - Germination index at the hard grain stage (GS92-GS93); \*\_1 - the first dominant color; \*\_2 - the second dominant color; \*\_3 - the third dominant color; MLM2 - MLM with population structure and kinship.

| <b>Trait</b> | <b>Heritability, %</b> | <b>Best model</b> |
|--------------|------------------------|-------------------|
| FN           | 56.8                   | BLINK; FarmCPU    |
| GI_milk      | 52.8                   | FarmCPU           |
| GI_mat       | 50.4                   | BLINK; FarmCPU    |
| RGB_mR       | 46.2                   | BLINK; FarmCPU    |
| RGB_mG       | 31.3                   | MLM2              |
| RGB_mB       | 17.2                   | -                 |
| RGB_dCR_1    | 37                     | BLINK             |
| RGB_dCG_1    | 26.7                   | MLM2              |
| RGB_dCB_1    | 28.1                   | BLINK; FarmCPU    |
| RGB_dCR_2    | 43.6                   | CMLM              |
| RGB_dCG_2    | 25.8                   | BLINK; FarmCPU    |
| RGB_dCB_2    | 6.9                    | -                 |
| RGB_dCR_3    | 11.9                   | -                 |
| RGB_dCG_3    | 0.2                    | -                 |
| RGB_dCB_3    | 0                      | -                 |
| HSV_mH       | 37.9                   | BLINK; FarmCPU    |
| HSV_mS       | 26.5                   | BLINK; FarmCPU    |
| HSV_mV       | 46.3                   | BLINK; FarmCPU    |
| HSV_dCH_1    | 19.6                   | -                 |
| HSV_dCS_1    | 15.5                   | -                 |
| HSV_dCV_1    | 28                     | BLINK             |
| HSV_dCH_2    | 35.7                   | CMLM              |
| HSV_dCS_2    | 0.4                    | -                 |
| HSV_dCV_2    | 15.4                   | -                 |
| HSV_dCH_3    | 0                      | -                 |
| HSV_dCS_3    | 5.4                    | -                 |
| HSV_dCV_3    | 0                      | -                 |
| Lab_mL       | 34.8                   | BLINK; FarmCPU    |
| Lab_ma       | 29.3                   | CMLM; MLM2        |
| Lab_mb       | 45.9                   | CMLM; MLM2        |
| Lab_dCL_1    | 34.5                   | BLINK             |
| Lab_dCa_1    | 28.6                   | BLINK; FarmCPU    |
| Lab_dCb_1    | 35.9                   | BLINK             |
| Lab_dCL_2    | 28.9                   | BLINK; FarmCPU    |
| Lab_dCa_2    | 16                     | -                 |
| Lab_dCb_2    | 42.5                   | CMLM; MLM2        |
| Lab_dCL_3    | 0                      | -                 |
| Lab_dCa_3    | 2.8                    | -                 |
| Lab_dCb_3    | 24.5                   | BLINK; FarmCPU    |
| YCrCb_mY     | 33.4                   | FarmCPU           |
| YCrCb_mCr    | 35.6                   | BLINK; FarmCPU    |
| YCrCb_mCb    | 48.9                   | CMLM; MLM2        |
| YCrCb_dCY_1  | 31.9                   | BLINK             |

|              |      |                |
|--------------|------|----------------|
| YCrCb_dCCr_1 | 37.4 | BLINK          |
| YCrCb_dCCb_1 | 36.1 | BLINK          |
| YCrCb_dCY_2  | 25.5 | BLINK; FarmCPU |
| YCrCb_dCCr_2 | 33.3 | MLM2           |
| YCrCb_dCCb_2 | 44.8 | CMLM; MLM2     |
| YCrCb_dCY_3  | 0    | -              |
| YCrCb_dCCr_3 | 14.8 | -              |
| YCrCb_dCCb_3 | 22   | BLINK; FarmCPU |

**Table S3.** Comparing trait values between different *Tamyb10* dosage (1, 2, 3 and 5 dominant alleles). FN - Falling number; GI\_mat - GI at hard grain stage; GI\_milk - GI at hard milk/soft dough stage

| <b>Trait</b> | <b>Test</b>   | <b><i>p</i>-value</b> |
|--------------|---------------|-----------------------|
| RGB_mR       | Welch's ANOVA | 0.18                  |
| RGB_mG       | Welch's ANOVA | 0.16                  |
| RGB_mB       | Welch's ANOVA | 0.39                  |
| HSV_mH       | Welch's ANOVA | 0.12                  |
| HSV_mS       | Welch's ANOVA | 0.30                  |
| HSV_mV       | Welch's ANOVA | 0.18                  |
| Lab_mL       | Welch's ANOVA | 0.17                  |
| Lab_ma       | Welch's ANOVA | 0.30                  |
| Lab_mb       | Welch's ANOVA | 0.19                  |
| YCrCb_mY     | Welch's ANOVA | 0.17                  |
| YCrCb_mCr    | Welch's ANOVA | 0.31                  |
| YCrCb_mCb    | Welch's ANOVA | 0.19                  |

## Supplementary figure

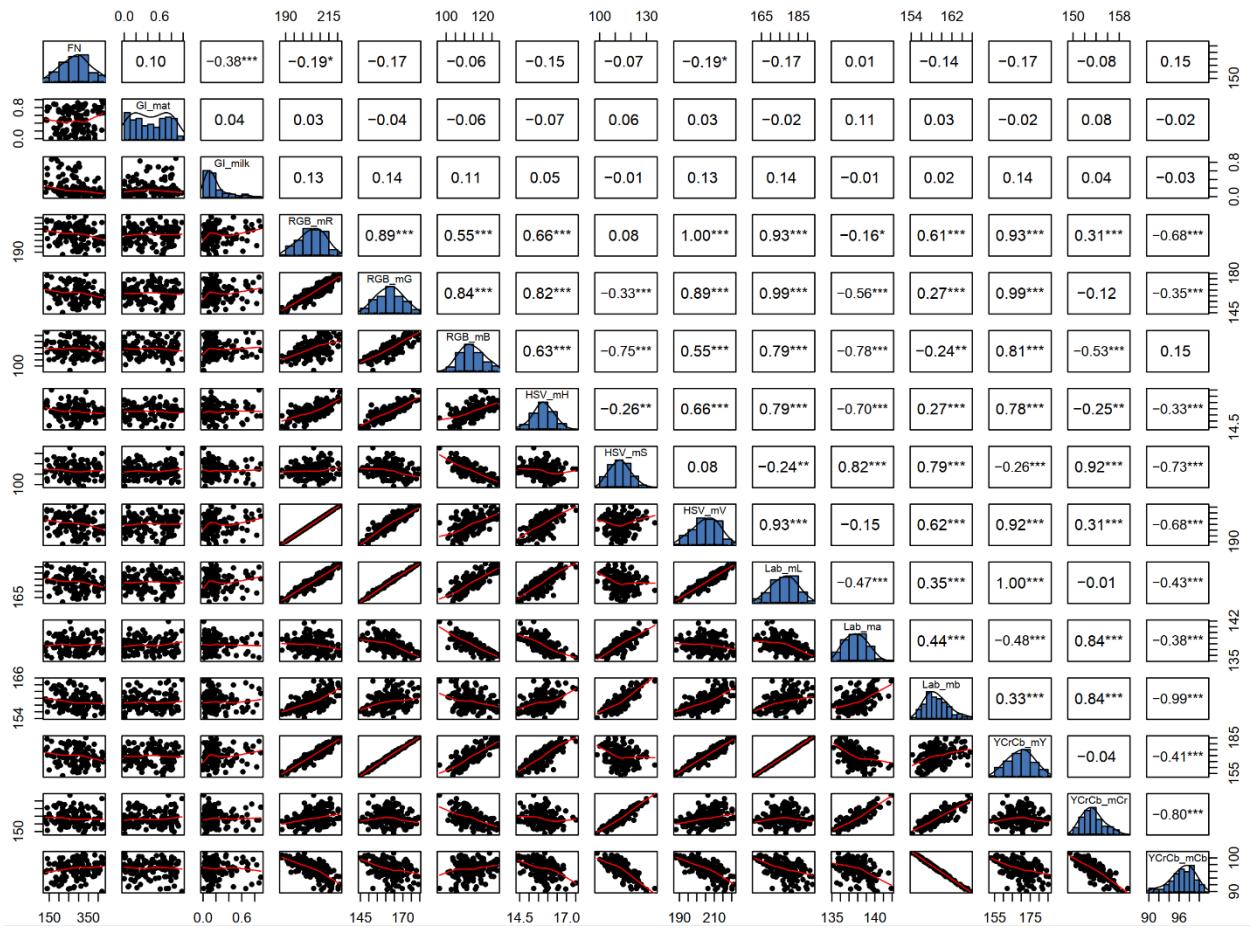

**Figure S1.** Distribution of the estimates of 15 seed traits in the population of red colored seed winter wheat and their pair-wise relationship statistics (Spearman's correlation coefficient).
